# Supplementary material for: Toxicity evaluation of gold nanoparticles using an Allium cepa bioassay
Source: Royal Society of Chemistry journal article supplement (doi:10.1039/c6ra04712b), 2016-01-01
Supplement: c6ra04712b1.pdf [file c6ra04712b1.pdf]

## **Toxicity evaluation of gold nanoparticles using *Allium cepa* bioassay**

A. Rajeshwari, S. Suresh, Natarajan Chandrasekaran, and Amitava Mukherjee\*

Centre for Nanobiotechnology, VIT University, Vellore, India

Supplementary Information

**\* Corresponding Author**

**Dr. Amitava Mukherjee BE, ME, Ph.D**

**Sr. Professor & Deputy Director**

**Centre for Nanobiotechnology**

**VIT University**

**Vellore 632014, India**

**Email: [amit.mookerjea@gmail.com](mailto:amit.mookerjea@gmail.com), [amitav@vit.ac.in](mailto:amitav@vit.ac.in)**

**Tel.: +91 416 220 2620**

**Results:**

**Figure S1.** The UV-visible spectra of as-synthesized gold NPs (A) Au15, (B) Au30, and (C) Au40

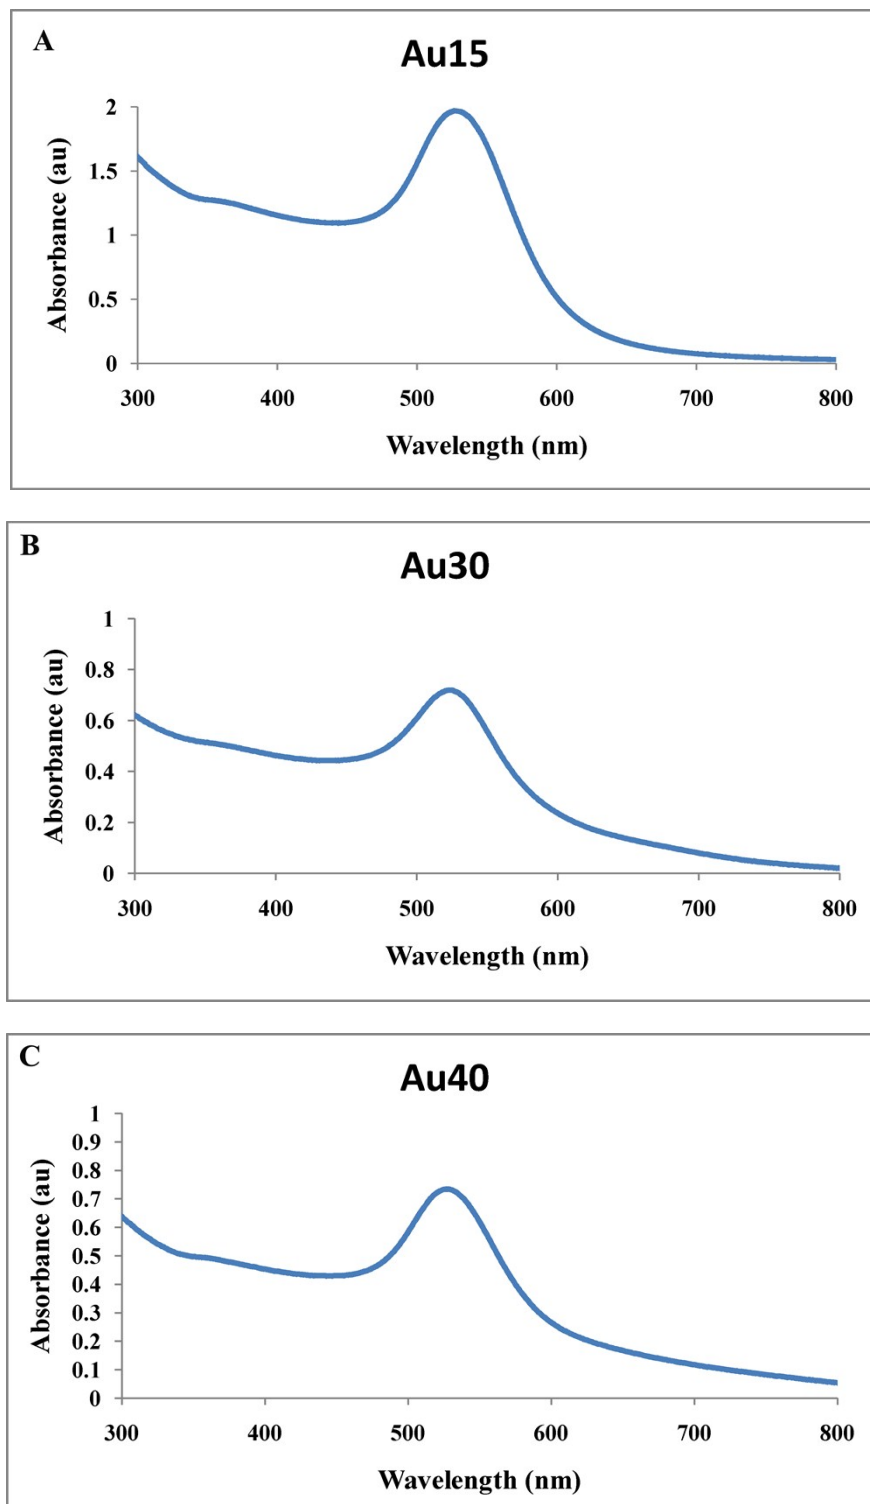

**Table S1.** Concentration of total and dissolve gold in the samples measured by ICP-OES

| Gold NPs | Total gold<br>( $\mu\text{g/mL}$ ) | Dissolved gold<br>( $\mu\text{g/mL}$ ) | NP concentration<br>( $\mu\text{g/mL}$ ) |
|----------|------------------------------------|----------------------------------------|------------------------------------------|
| Au15     | 55.5                               | 30.1                                   | 25.4                                     |
| Au30     | 10.0                               | 0.0                                    | 10.0                                     |
| Au40     | 10.0                               | 0.0                                    | 10.0                                     |
